# Supplementary material
Source: ML conference proceedings conference paper supplement (https://openreview.net/forum?id=Ux5zdAir9-U)
Supplement: supplementary_material [file attachment]

## A GRAPHLOG

### A.1 EXTENDED TERMINOLOGY

In this section, we extend the terminology introduced in Section 3 to introduce the term *descriptor*. A descriptor of a query graph  $g$  is computed by concatenating the relations occurring on the shortest path from the source and sink in the query  $(u, v)$ . For example, if a query graph is described in the form of a list of edges such as  $g \rightarrow (0, 1, r_1), (1, 2, r_2), (1, 3, r_3), (2, 4, r_4)$ , where  $r_i$  are the relations, then the descriptor of this graph given the query  $(0, 4)$  would be  $D_g = r_1, r_2, r_4$ . In all our train, validation and test splits, we split graphs based on the unique set of descriptors, such as to maintain inductive reasoning aspect of the task.

### A.2 DATASET GENERATION

This section follows up on the discussion in Section 3.1. We describe all the steps involved in the dataset generation process.

**Rule Generation.** In Algorithm 1, we describe the complete process of generating rules in GraphLog. We require the set of  $K$  relations, which we use to sample the rule set  $\mathcal{R}$ . Then, we iterate through all possible combinations of relations in DataLog format to sample possible candidate rules. We impose two constraints on the candidate rule: (i) No two rules in  $\mathcal{R}$  can have the same body. This ensures consistency between the rules. (ii) Candidate rules cannot have common relations among the *head* and *body*. This ensures absence of cycles. We also add the inverse rule of our sampled candidate rule and check the same consistencies again. We employ two types of unary Horn clauses to perform the closure of the available rules and to check the consistency of the different rules in  $\mathcal{R}$ . Using this process, we ensure that all generated rules are sound and consistent with respect to  $\mathcal{R}$ .

**World Sampling.** From the set of rules in  $\mathcal{R}$ , we partition rules into buckets for different worlds (Algorithm 2). We use a simple policy of bucketing via a sliding window of width  $w$  with stride  $s$ , to classify rules pertaining to each world. For example, two such consecutive worlds can be generated as  $\mathcal{R}^t = [\mathcal{R}_i \dots \mathcal{R}_{i+w}]$  and  $\mathcal{R}^{t+1} = [\mathcal{R}_{i+s} \dots \mathcal{R}_{i+w+s}]$ . (Algorithm 2) We randomly permute  $\mathcal{R}$  before bucketing in-order.

**Graph Generation.** This is a two-step process where first we sample a *world graph* (Algorithm 3) and then we sample individual graphs from the *world graph* (Algorithm 4). Given a set of rules  $\mathcal{R}_S$ , in the first step, we recursively sample and apply rules in  $\mathcal{R}_S$  to generate a *relation graph* called *world graph*. This sampling procedure enables us to create a diverse set of *world graphs* by considering only certain subsets (of  $\mathcal{R}$ ) during sampling. By controlling the extent of overlap between the subsets of  $\mathcal{R}$  (in terms of the number of rules that are common across the subsets), we can precisely control the *similarity* between the different *world graphs*. By selecting subsets which have higher dissimilarity between each other, we introduce more diversity in terms of logical rules.

In the second step (Algorithm 4), the *world graph* is used to sample a set of query graphs  $G_W^S = \{g_1, \dots, g_N\}$ . A query graph  $g_i$  is sampled from  $G_W$  by sampling a pair of nodes  $(u, v)$  from  $G_W$  and then by sampling a *resolution path*  $p_{G_W}^{u,v}$ . The edge  $r_i(u, v)$  provides the target relation that the learning model has to predict. Since the *relation* for the edge  $r_i(u, v)$  can be *resolved* by composing the relations along the *resolution path*, the relation prediction task tests for the compositional generalization abilities of the models. We first sample all possible resolution paths and get their individual descriptors  $D_{g_i}$ , which we split in training, validation and test splits. We then construct the training, validation and testing graphs by first adding all edges of an individual  $D_{g_i}$  to the corresponding query graph  $g_i$ , and then sampling neighbors of  $p_{g_i}$ . Concretely, we use Breadth First Search (BFS) to sample the neighboring subgraph of each node  $u \in p_{g_i}$  with a decaying selection probability  $\gamma$ . This allows us to create diverse input graphs while having precise control over its resolution by its descriptor  $D_{g_i}$ . Splitting the dataset over these descriptor paths ensures inductive generalization.

### A.3 COMPUTING SIMILARITY

GraphLog provides precise control for categorizing the similarity between different worlds by computing the overlap of the underlying rules. Concretely, the similarity between two worlds  $W^i$  and

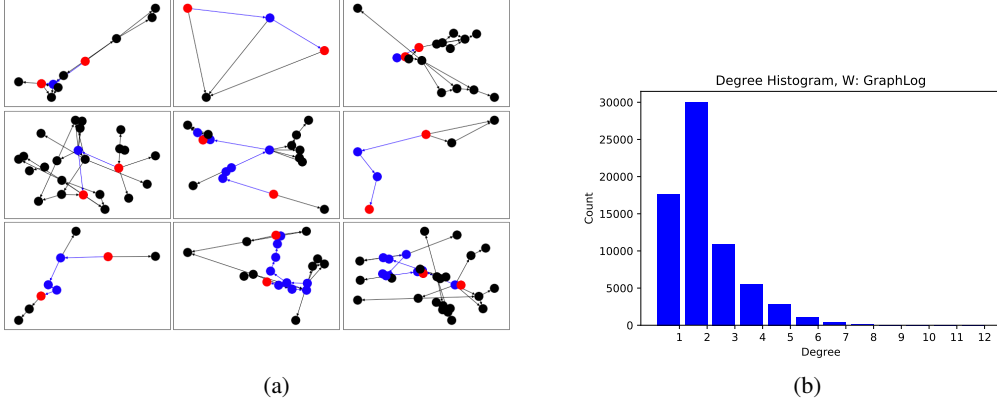

Figure 7: Figure 7(a) represents graphs drawn at random from different worlds available in GraphLog . Nodes in red denote the query nodes, and the nodes in blue denote the shortest path among the query nodes. Figure 7(b) represents the degree distribution of all graphs from all worlds in GraphLog .

---

**Algorithm 1** Rule Generator

---

**Input:** Set of  $K$  relations  $\{r_i\}_K, K > 0$   
Define an empty rule set  $\mathcal{R}$   
**for all**  $r_i \in \{r_i\}_K$  **do**  
  **for all**  $r_j \in \{r_i\}_K$  **do**  
    **for all**  $r_k \in \{r_i\}_K$  **do**  
      Define candidate rule  $t : [r_i, r_j] \implies r_k$   
      **if** Cyclical rule, i.e.  $r_i == r_k$  OR  $r_j == r_k$  **then**  
        Reject rule  
      **end if**  
      **if**  $t[body] \notin \mathcal{R}$  **then**  
        Add  $t$  to  $\mathcal{R}$   
      **end if**  
    **end for**  
  **end for**  
**end for**  
Check and remove any further cyclical rules.

---

$W^j$  is defined as  $\text{Sim}(W^i, W^j) = |\mathcal{R}^i \cap \mathcal{R}^j|$ , where  $W_i$  and  $W_j$  are the graph worlds and  $\mathcal{R}^i$  and  $\mathcal{R}^j$  are the set of rules associated with them. Thus GraphLog enables various training scenarios - training on highly similar worlds or training on a mix of similar and dissimilar worlds. This fine grained control allows GraphLog to mimic both in-distribution and out-of-distribution scenarios - during training and testing. It also enables us to precisely categorize the effect of multi-task pre-training when the model needs to adapt to novel worlds.

---

**Algorithm 2** Partition rules into overlapping sets

---

**Require:** Rule Set  $\mathcal{R}_S$   
**Require:** Number of worlds  $n_w > 0$   
**Require:** Number of rules per world  $w > 0$   
**Require:** Overlapping increment stride  $s > 0$   
**for**  $i = 0; i < |\mathcal{R}_S| - w; \mathbf{do}$   
   $\mathcal{R}_i = \mathcal{R}_S[i; i + w]$   
   $i = i + s$   
**end for**

---

**Algorithm 3** World Graph Generator

---

**Require:** Set of relations  $\{r_i\}_K, K > 0$   
**Require:** Set of rules derived from  $\{r_i\}_K, |\mathcal{R}| > 0$   
**Require:** Set rule selection probability gamma  $\gamma = 0.8$   
 Set rule selection probability  $P[\mathcal{R}[i]] = 1, \forall i \in |\mathcal{R}|$   
**Require:** Maximum number of expansions  $s \geq 2$   
**Require:** Set of available nodes  $N$ , s.t.  $|N| \geq 0$   
**Require:** Number of cycles of generation  $c \geq 0$   
 Set *WorldGraph* set of edges  $G_m = \emptyset$   
**while**  $|N| > 0$  or  $c > 0$  **do**  
     Randomly choose an expansion number for this cycle:  $\text{steps} = \text{rand}(2, s)$   
     Set added edges for this cycle  $E_c = \emptyset$   
     **for all** step in steps **do**  
         **if** step = 0 **then**  
             With uniform probability, either:  
             Sample  $r_t$  from  $\mathcal{R}_S[\text{head}]$  and sample  $u, v \in N$  without replacement, OR  
             Sample an edge  $(u, r_t, v)$  from  $G_m$   
             Add  $(u, r_t, v)$  to  $E_c$  and  $G_m$   
         **else**  
             Sample an edge  $(u, r_t, v)$  from  $E_c$   
         **end if**  
         Sample a rule  $\mathcal{R}[i]$  from  $\mathcal{R}$  following  $P$  s.t.  $[r_i, r_j] \implies r_t$   
          $P[\mathcal{R}[i]] = P[\mathcal{R}[i]] * \gamma$   
         Sample a new node  $y \in N$  without replacement  
         Add edge  $(u, r_i, y)$  to  $E_c$  and  $G_m$   
         Add edge  $(y, r_j, v)$  to  $E_c$  and  $G_m$   
     **end for**  
     **if** All rules in  $\mathcal{R}$  is used atleast once **then**  
         Increment  $c$  by 1  
         Reset rule selection probability  $P[\mathcal{R}[i]] = 1, \forall i \in |\mathcal{R}|$   
     **end if**  
**end while**

---

## A.4 COMPUTING DIFFICULTY

Recent research in multitask learning has shown evidence that models prioritize selection of difficult tasks over easy tasks while learning to boost the overall performance (Guo et al., 2018). Thus, GraphLog also provides a method to examine how pretraining on tasks of different difficulty level affects the adaptation performance. Due to the stochastic effect of partitioning of the rules, GraphLog consists of datasets with varying range of difficulty. We use the supervised learning scores (Table 6) as a proxy to determine the the relative difficulty of different datasets. We cluster the datasets such that tasks with prediction accuracy greater than or above 70% are labeled as *easy* difficulty, 50-70% are labeled as *medium* difficulty and below 50% are labeled as *hard* difficulty dataset. We find that the labels obtained by this criteria are consistent across the different models (Figure 3).

**Graph properties affecting difficulty.** While we compute difficulty based on the proxy of supervised learning scores, we observe that the relative difficulty of the tasks are highly correlated with the number of *descriptors* (Section A.1) available for each task. We can control the distribution of the dataset by explicitly requiring diversity in the descriptors. Worlds having less number of descriptors are prone to be more difficult for the task. This is due to the fact that will less available descriptors with respect to the budget of data samples, our generation module samples the same set of descriptors while adding variable noise. Thus, datasets with low descriptor count ends up with more relative noise. This shows that for a learner, a dataset with enough variety among the resolution paths of the graphs with less noise is relatively easier to learn compared to the datasets which has less variation and more noise.

**Algorithm 4** Graph Sampler

---

**Require:** Rule Set  $\mathcal{R}_S$   
**Require:** World Graph  $G_m = (V_m, E_m)$   
**Require:** Maximum Expansion length  $e > 2$   
Set Descriptor set  $S = \emptyset$   
**for all**  $u, v \in E_m$  **do**  
    Get all walks  $Y_{(u,v)} \in G_m$  such that  $|Y_{(u,v)}| \leq e$   
    Get all descriptors  $D_{Y_{(u,v)}}$  for all walks  $Y_{(u,v)}$   
    Add  $D_{Y_{(u,v)}}$  to  $S$   
**end for**  
Set train graph set  $G_{train} = \emptyset$   
Set test graph set  $G_{test} = \emptyset$   
Split descriptors in train and test split,  $S_{train}$  and  $S_{test}$   
**for all**  $D_i \in S_{train}$  or  $S_{test}$  **do**  
    Set source node  $u_s = D_i[0]$  and sink node  $v_s = D_i[-1]$   
    Set prediction target  $t = E_m[u_s][v_s]$   
    Set graph edges  $g_i = \emptyset$   
    Add all edges from  $D_i$  to  $g_i$   
    **for all**  $u, v \in D_i$  **do**  
        Sample Breadth First Search connected nodes from  $u$  and  $v$  with decaying probability  $\gamma$   
        Add the sampled edges to  $g_i$   
    **end for**  
    Remove edges in  $g_i$  which create shorter paths between  $u_s$  and  $v_s$   
    Add  $(g_i, u_s, v_s, t)$  to either  $G_{train}$  or  $G_{test}$   
**end for**

---

**B SUPERVISED LEARNING ON GRAPHLOG**

We perform extensive experiments over *all* the datasets available in GraphLog (statistics given in Table 6). We observe that in general, for the entire set of 57 worlds, the GAT-E-GAT model performs the best.

**C MULTITASK LEARNING****C.1 MULTITASK LEARNING ON DIFFERENT DATA SPLITS BY DIFFICULTY**

|       |       | Easy                    | Medium                  | Difficult               |
|-------|-------|-------------------------|-------------------------|-------------------------|
| $f_r$ | $f_c$ | Accuracy                | Accuracy                | Accuracy                |
| GAT   | E-GAT | <b>0.729</b> $\pm 0.05$ | <b>0.586</b> $\pm 0.05$ | 0.414 $\pm 0.07$        |
| Param | E-GAT | 0.728 $\pm 0.05$        | 0.574 $\pm 0.06$        | 0.379 $\pm 0.06$        |
| GCN   | E-GAT | 0.713 $\pm 0.05$        | 0.55 $\pm 0.06$         | 0.396 $\pm 0.05$        |
| GAT   | RGCN  | 0.695 $\pm 0.04$        | 0.53 $\pm 0.03$         | <b>0.421</b> $\pm 0.06$ |
| Param | RGCN  | 0.551 $\pm 0.08$        | 0.457 $\pm 0.05$        | 0.362 $\pm 0.05$        |
| GCN   | RGCN  | 0.673 $\pm 0.05$        | 0.514 $\pm 0.04$        | 0.396 $\pm 0.06$        |

Table 4: Inductive performance on data splits marked by difficulty

In Section A.4 we introduced the notion of *difficulty* among the tasks available in GraphLog. Here, we consider a set of experiments where we perform multitask training and inductive testing on the worlds bucketized by their relative difficulty (Table 4). We sample equal number of worlds from each difficulty bucket, and separately perform multitask training and testing. We evaluate the average prediction accuracy on the datasets within each bucket. We observe that the average multitask performance *also* mimics the relative task difficulty distribution. We find GAT-E-GAT model outperforms other baselines in *Easy* and *Medium* setup, but is outperformed by GAT-RGCN model in the *Difficult* setup. For each model, we used the same architecture and hyperparameter settings across the buckets. Optimizing individually for each bucket may improve the relative performance.

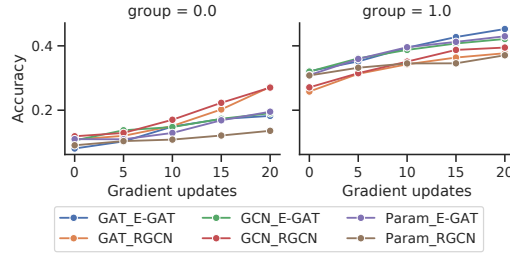

Figure 8: We perform fine-grained analysis of *few shot* adaptation capabilities in Multitask setting. Group 0.0 and 1.0 corresponds to 0% and 100% similarity respectively.

|       |       | Easy                    | Medium                  | Difficult               |
|-------|-------|-------------------------|-------------------------|-------------------------|
| $f_r$ | $f_c$ | Accuracy                | Accuracy                | Accuracy                |
| GAT   | E-GAT | 0.531 $\pm$ 0.03        | <b>0.569</b> $\pm$ 0.01 | <b>0.555</b> $\pm$ 0.04 |
| Param | E-GAT | 0.520 $\pm$ 0.02        | 0.548 $\pm$ 0.01        | 0.540 $\pm$ 0.01        |
| GCN   | E-GAT | <b>0.555</b> $\pm$ 0.01 | 0.561 $\pm$ 0.02        | 0.558 $\pm$ 0.01        |
| GAT   | RGCN  | 0.502 $\pm$ 0.02        | 0.532 $\pm$ 0.01        | 0.532 $\pm$ 0.01        |
| Param | RGCN  | 0.535 $\pm$ 0.01        | 0.506 $\pm$ 0.04        | 0.539 $\pm$ 0.04        |
| GCN   | RGCN  | 0.481 $\pm$ 0.02        | 0.516 $\pm$ 0.02        | 0.520 $\pm$ 0.01        |
| Mean  |       | 0.521                   | <b>0.540</b>            | 0.539                   |

Table 5: Convergence performance on 3 held out datasets when pre-trained on easy, medium and hard training datasets

## C.2 MULTITASK PRE-TRAINING BY TASK SIMILARITY

In the main paper (Section 5.2) we introduce the setup of performing multitask pre-training on GraphLog datasets and adaptation on the datasets based on relative similarity. Here, we perform fine-grained analysis of *few-shot* adaptation capabilities of the models. We analyze the adaptation performance in two settings - when the adaptation dataset has complete overlap of rules with the training datasets ( $group=1.0$ ) and when the adaptation dataset has zero overlap with the training datasets ( $group=0.0$ ). We find RGCN family of models with a graph based representation function has faster adaptation on the dissimilar dataset, with GCN-RGCN showing the fastest improvement. However on the similar dataset the models follow the ranking of the supervised learning experiments, with GAT-EGAT model adapting comparatively better.

## C.3 MULTITASK PRE-TRAINING BY TASK DIFFICULTY

Using the notion of *difficulty* introduced in Section A.4, we perform the suite of experiments to evaluate the effect of pre-training on *Easy*, *Medium* and *Difficult* datasets. Interestingly, we find the performance on convergence is better on Medium and Hard datasets on pre-training, compared to the Easy dataset (Table 5). This behaviour is also mirrored in k-shot adaptation performance (Figure ??), where pre-training on Hard dataset provides faster adaptation performance on 4/6 models.

## D CONTINUAL LEARNING

A natural question arises following our continual learning experiments in Section 5.3 : does the *order* of difficulty of the worlds matter? Thus, we perform an experiment following Curriculum Learning (Bengio et al., 2009) setup, where the order of the worlds being trained is determined by their relative difficulty (which is determined by the performance of models in supervised learning setup, Table 6, i.e., we order the worlds from easier worlds to harder worlds). We observe that while the current task accuracy follows the trend of the difficulty of the worlds (Figure 10(a)), the mean of past accuracy is significantly worse. This suggests that a curriculum learning strategy might not be optimal to learn graph representations in a continual learning setting. We also performed the same experiment with sharing only the composition and representation functions (Figure 10(b)), and observe similar trends where sharing the representation function reduces the effect of catastrophic forgetting.

| World ID | NC    | ND     | Split | ARL  | AN     | AE     | D      | M1                | M2         | M3         | M4        | M5        | M6        |
|----------|-------|--------|-------|------|--------|--------|--------|-------------------|------------|------------|-----------|-----------|-----------|
| rule_0   | 17    | 286    | train | 4.49 | 15.487 | 19.295 | Hard   | 0.481             | 0.500      | 0.494      | 0.486     | 0.462     | 0.462     |
| rule_1   | 15    | 239    | train | 4.10 | 11.565 | 13.615 | Hard   | 0.432             | 0.411      | 0.428      | 0.406     | 0.400     | 0.408     |
| rule_2   | 17    | 157    | train | 3.21 | 9.809  | 11.165 | Hard   | 0.412             | 0.357      | 0.373      | 0.347     | 0.347     | 0.319     |
| rule_3   | 16    | 189    | train | 3.63 | 11.137 | 13.273 | Hard   | 0.429             | 0.404      | 0.473      | 0.373     | 0.401     | 0.451     |
| rule_4   | 16    | 189    | train | 3.94 | 12.622 | 15.501 | Medium | 0.624             | 0.606      | 0.619      | 0.475     | 0.481     | 0.595     |
| rule_5   | 14    | 275    | train | 4.41 | 14.545 | 18.872 | Hard   | 0.526             | 0.539      | 0.548      | 0.429     | 0.461     | 0.455     |
| rule_6   | 16    | 249    | train | 5.06 | 16.257 | 20.164 | Hard   | 0.528             | 0.514      | 0.536      | 0.498     | 0.495     | 0.476     |
| rule_7   | 17    | 288    | train | 4.47 | 13.161 | 16.333 | Medium | 0.613             | 0.558      | 0.598      | 0.487     | 0.486     | 0.537     |
| rule_8   | 15    | 404    | train | 5.43 | 15.997 | 19.134 | Medium | 0.627             | 0.643      | 0.629      | 0.523     | 0.563     | 0.569     |
| rule_9   | 19    | 1011   | train | 7.22 | 24.151 | 32.668 | Easy   | 0.758             | 0.744      | 0.739      | 0.683     | 0.651     | 0.623     |
| rule_10  | 18    | 524    | train | 5.87 | 18.011 | 22.202 | Medium | 0.656             | 0.654      | 0.663      | 0.596     | 0.563     | 0.605     |
| rule_11  | 17    | 194    | train | 4.29 | 11.459 | 13.037 | Medium | 0.552             | 0.525      | 0.533      | 0.445     | 0.456     | 0.419     |
| rule_12  | 15    | 306    | train | 4.14 | 11.238 | 12.919 | Easy   | 0.771             | 0.726      | 0.603      | 0.511     | 0.561     | 0.523     |
| rule_13  | 16    | 149    | train | 3.58 | 11.238 | 13.549 | Hard   | 0.453             | 0.402      | 0.419      | 0.347     | 0.298     | 0.344     |
| rule_14  | 16    | 224    | train | 4.14 | 11.371 | 13.403 | Hard   | 0.448             | 0.457      | 0.401      | 0.314     | 0.318     | 0.332     |
| rule_15  | 14    | 224    | train | 3.82 | 12.661 | 15.105 | Hard   | 0.494             | 0.423      | 0.501      | 0.402     | 0.397     | 0.435     |
| rule_16  | 16    | 205    | train | 3.59 | 11.345 | 13.293 | Hard   | 0.318             | 0.332      | 0.292      | 0.328     | 0.306     | 0.291     |
| rule_17  | 17    | 147    | train | 3.16 | 8.163  | 8.894  | Hard   | 0.347             | 0.308      | 0.274      | 0.164     | 0.161     | 0.181     |
| rule_18  | 18    | 923    | train | 6.63 | 25.035 | 33.080 | Easy   | 0.700             | 0.680      | 0.713      | 0.650     | 0.641     | 0.618     |
| rule_19  | 16    | 416    | train | 6.10 | 17.180 | 20.818 | Easy   | 0.790             | 0.774      | 0.777      | 0.731     | 0.729     | 0.702     |
| rule_20  | 20    | 2024   | train | 8.63 | 34.059 | 45.985 | Easy   | 0.830             | 0.799      | 0.854      | 0.756     | 0.741     | 0.750     |
| rule_21  | 13    | 272    | train | 4.58 | 10.559 | 11.754 | Medium | 0.621             | 0.610      | 0.632      | 0.531     | 0.516     | 0.580     |
| rule_22  | 17    | 422    | train | 5.21 | 16.540 | 20.681 | Medium | 0.586             | 0.593      | 0.628      | 0.530     | 0.506     | 0.573     |
| rule_23  | 15    | 383    | train | 4.97 | 17.067 | 21.111 | Hard   | 0.508             | 0.522      | 0.493      | 0.455     | 0.473     | 0.476     |
| rule_24  | 18    | 879    | train | 6.33 | 21.402 | 26.152 | Easy   | 0.706             | 0.704      | 0.743      | 0.656     | 0.641     | 0.638     |
| rule_25  | 15    | 278    | train | 3.84 | 11.093 | 12.775 | Hard   | 0.424             | 0.419      | 0.382      | 0.358     | 0.345     | 0.412     |
| rule_26  | 15    | 352    | train | 4.71 | 14.157 | 17.115 | Medium | 0.565             | 0.534      | 0.532      | 0.466     | 0.461     | 0.499     |
| rule_27  | 16    | 393    | train | 4.98 | 14.296 | 16.499 | Easy   | 0.713             | 0.714      | 0.722      | 0.632     | 0.604     | 0.647     |
| rule_28  | 16    | 391    | train | 4.82 | 17.551 | 21.897 | Medium | 0.575             | 0.564      | 0.571      | 0.503     | 0.499     | 0.552     |
| rule_29  | 16    | 144    | train | 3.87 | 10.193 | 11.774 | Hard   | 0.468             | 0.445      | 0.475      | 0.325     | 0.336     | 0.389     |
| rule_30  | 17    | 177    | train | 3.51 | 10.270 | 11.764 | Hard   | 0.381             | 0.426      | 0.382      | 0.357     | 0.316     | 0.336     |
| rule_31  | 19    | 916    | train | 5.90 | 20.147 | 26.562 | Easy   | 0.788             | 0.789      | 0.770      | 0.669     | 0.674     | 0.641     |
| rule_32  | 16    | 287    | train | 4.66 | 16.270 | 20.929 | Medium | 0.674             | 0.671      | 0.700      | 0.621     | 0.594     | 0.615     |
| rule_33  | 18    | 312    | train | 4.50 | 14.738 | 18.266 | Medium | 0.695             | 0.660      | 0.709      | 0.710     | 0.679     | 0.668     |
| rule_34  | 18    | 504    | train | 5.00 | 15.345 | 18.614 | Easy   | 0.908             | 0.888      | 0.906      | 0.768     | 0.762     | 0.811     |
| rule_35  | 19    | 979    | train | 6.23 | 21.867 | 28.266 | Easy   | 0.831             | 0.750      | 0.782      | 0.680     | 0.700     | 0.662     |
| rule_36  | 19    | 252    | train | 4.66 | 13.900 | 16.613 | Easy   | 0.742             | 0.698      | 0.698      | 0.659     | 0.627     | 0.651     |
| rule_37  | 17    | 260    | train | 4.00 | 11.956 | 14.010 | Easy   | 0.843             | 0.826      | 0.826      | 0.673     | 0.698     | 0.716     |
| rule_38  | 17    | 568    | train | 5.21 | 15.305 | 20.075 | Easy   | 0.748             | 0.762      | 0.733      | 0.644     | 0.630     | 0.719     |
| rule_39  | 15    | 182    | train | 3.98 | 12.552 | 14.800 | Easy   | 0.737             | 0.642      | 0.635      | 0.592     | 0.603     | 0.587     |
| rule_40  | 17    | 181    | train | 3.69 | 11.556 | 14.437 | Medium | 0.552             | 0.584      | 0.575      | 0.525     | 0.472     | 0.479     |
| rule_41  | 15    | 113    | train | 3.58 | 10.162 | 11.553 | Medium | 0.619             | 0.601      | 0.626      | 0.490     | 0.468     | 0.470     |
| rule_42  | 14    | 95     | train | 2.96 | 8.939  | 9.751  | Hard   | 0.511             | 0.472      | 0.483      | 0.386     | 0.393     | 0.395     |
| rule_43  | 16    | 162    | train | 3.36 | 11.077 | 13.337 | Medium | 0.622             | 0.567      | 0.579      | 0.473     | 0.482     | 0.437     |
| rule_44  | 18    | 705    | train | 4.75 | 15.310 | 18.172 | Hard   | 0.538             | 0.561      | 0.603      | 0.498     | 0.519     | 0.450     |
| rule_45  | 15    | 151    | train | 3.39 | 9.127  | 10.001 | Medium | 0.569             | 0.580      | 0.592      | 0.535     | 0.524     | 0.524     |
| rule_46  | 19    | 2704   | train | 7.94 | 31.458 | 43.489 | Easy   | 0.850             | 0.820      | 0.828      | 0.773     | 0.762     | 0.749     |
| rule_47  | 18    | 647    | train | 6.66 | 22.139 | 27.789 | Easy   | 0.723             | 0.667      | 0.708      | 0.620     | 0.649     | 0.611     |
| rule_48  | 16    | 978    | train | 6.15 | 17.802 | 21.674 | Easy   | 0.812             | 0.798      | 0.812      | 0.772     | 0.763     | 0.753     |
| rule_49  | 14    | 169    | train | 3.41 | 9.983  | 11.177 | Easy   | 0.714             | 0.734      | 0.700      | 0.511     | 0.491     | 0.615     |
| rule_50  | 16    | 286    | train | 3.99 | 12.274 | 16.117 | Medium | 0.651             | 0.653      | 0.656      | 0.555     | 0.583     | 0.570     |
| rule_51  | 16    | 332    | valid | 4.44 | 16.384 | 21.817 | Easy   | 0.746             | 0.742      | 0.738      | 0.667     | 0.657     | 0.689     |
| rule_52  | 17    | 351    | valid | 4.81 | 16.231 | 20.613 | Medium | 0.697             | 0.716      | 0.754      | 0.653     | 0.655     | 0.670     |
| rule_53  | 15    | 165    | valid | 3.65 | 10.838 | 12.378 | Hard   | 0.458             | 0.464      | 0.525      | 0.334     | 0.364     | 0.373     |
| rule_54  | 13    | 303    | test  | 5.25 | 13.503 | 15.567 | Medium | 0.638             | 0.623      | 0.603      | 0.587     | 0.586     | 0.555     |
| rule_55  | 16    | 293    | test  | 4.83 | 16.444 | 20.944 | Medium | 0.625             | 0.582      | 0.578      | 0.561     | 0.528     | 0.571     |
| rule_56  | 15    | 241    | test  | 4.40 | 14.010 | 16.702 | Medium | 0.653             | 0.681      | 0.692      | 0.522     | 0.513     | 0.550     |
| AGG      | 16.33 | 428.94 |       | 4.70 | 14.89  | 18.37  |        | <b>0.618 / 26</b> | 0.603 / 10 | 0.611 / 20 | 0.530 / 1 | 0.526 / 0 | 0.539 / 0 |

Table 6: Results on Single-task supervised setup for all datasets in GraphLog. Abbreviations: **NC**: Number of Classes, **ND**: Number of Descriptors, **ARL**: Average Resolution Length, **AN**: Average number of nodes, **AE**: Average number of edges

, **D**: Difficulty, **AGG**: Aggregate Statistics. List of models considered : **M1**: GAT-EGAT, **M2**: GCN-E-GAT, **M3**: Param-E-GAT, **M4**: GAT-RGCN, **M5**: GCN-RGCN and **M6**: Param-RGCN. Difficulty is calculated by taking the scores of the model (M1) and partitioning the worlds according to their accuracy ( $\geq 0.7$  = Easy,  $\geq 0.54$  and  $< 0.7$  = Medium, and  $< 0.54$  = Hard). We provide both the mean of the raw accuracy scores for all models, as well as the number of times the model is ranked first in all the tasks.

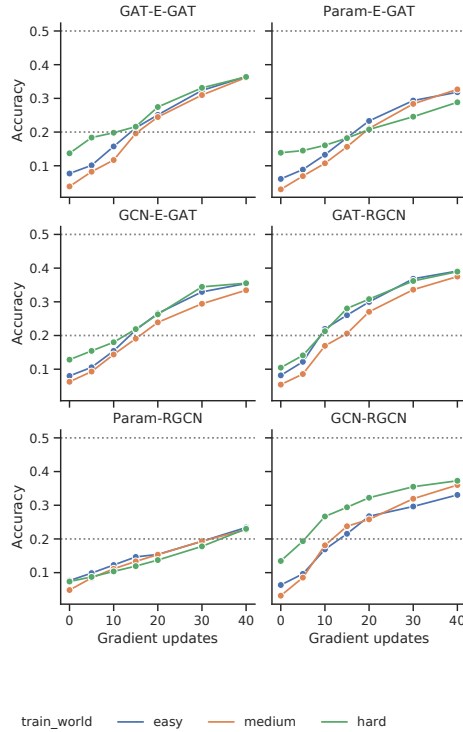

Figure 9: We evaluate the effect of  $k$ -shot adaptation on held out datasets when pre-trained on *easy*, *medium* and *hard* training datasets, among the different model architectures. Here,  $k$  ranges from 0 to 40.

## E HYPERPARAMETERS AND EXPERIMENTAL SETUP

In this section, we provide detailed hyperparameter settings for both models and dataset generation for the purposes of reproducibility. The codebase and dataset used in the experiments are attached with the Supplementary materials, and will be made public on acceptance.

### E.1 DATASET HYPERPARAMS

We generate GraphLog with 20 relations or classes ( $K$ ), which results in 76 rules in  $\mathcal{R}_S$  after consistency checks. For unary rules, we specify half of the relations to be symmetric and other half to have their invertible relations. To split the rules for individual worlds, we choose the number of rules for each world  $w = 20$  and stride  $s = 1$ , and end up with 57 worlds  $\mathcal{R}_0 \dots \mathcal{R}_{56}$ . For each world  $\mathcal{R}_i$ , we generate 5000 training, 1000 testing and 1000 validation graphs.

### E.2 MODEL HYPERPARAMS

For all models, we perform hyper-parameter sweep (grid search) to find the optimal values based on the validation accuracy. For all models, we use the relation embedding and node embedding to be 200 dimensions. Since the nodes in GraphLog does not have any features or attributes, we randomly initialize the embeddings in the GNN message passing layers for each epoch for all experiments. We train all models with Adam optimizer with learning rate 0.001 and weight decay of 0.0001. For supervised setting, we train all models for 500 epochs, and we add a scheduler for learning rate to decay it by 0.8 whenever the validation loss is stagnant for 10 epochs. In multitask setting, we sample a new task every epoch from the list of available tasks. Here, we run all models for 2000 epochs when we have the number of tasks  $\leq 10$ . For larger number of tasks (Figure 4), we train by proportionally increasing the number of epochs compared to the number of tasks. (2k epochs for 10 tasks, 4k epochs for 20 tasks, 6k epochs for 30 tasks, 8k epochs for 40 tasks and 10k epochs for

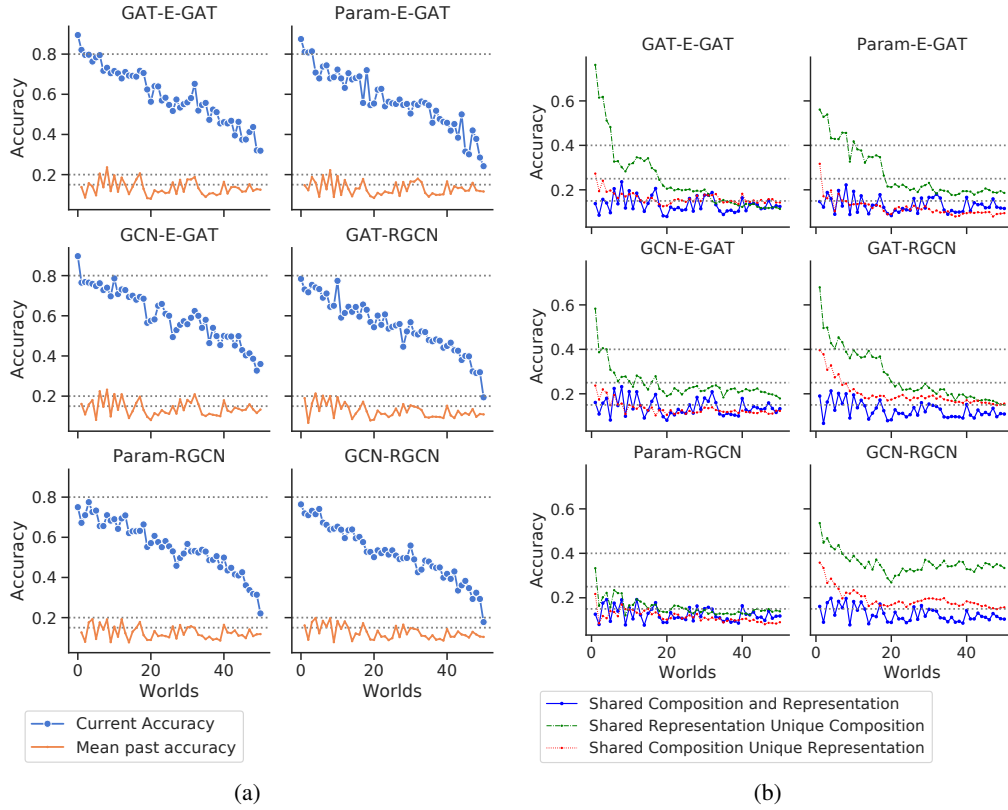

Figure 10: Curriculum Learning strategy in Continual Learning setup of GraphLog. Figure 10(a) presents the current task accuracy (blue) and mean of all previous task accuracy (orange). Figure 10(b) presents the mean of previous task accuracy when either the composition function or the representation function is shared for all worlds.



50 tasks). For continual learning experiment, we train each task for 100 epochs for all models. No learning rate scheduling is used for either multitask or continual learning experiments. Individual model hyper-parameters are as follows:

- Representation functions :
  - GAT : Number of layers = 2, Number of attention heads = 2, Dropout = 0.4
  - GCN : Number of layers = 2, with symmetric normalization and bias, no dropout
- Composition functions:
  - E-GAT: Number of layers = 6, Number of attention heads = 2, Dropout = 0.4
  - RGCN: Number of layers = 2, no dropout, with bias.
