# Supplementary material
Source: ML conference proceedings conference paper supplement (https://openreview.net/forum?id=Ux5zdAir9-U)
Supplement: supplementary_material [file attachment]

GAT-E-GAT

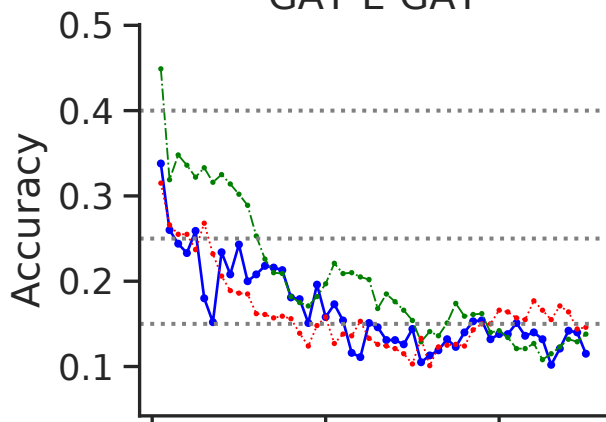

Param-E-GAT

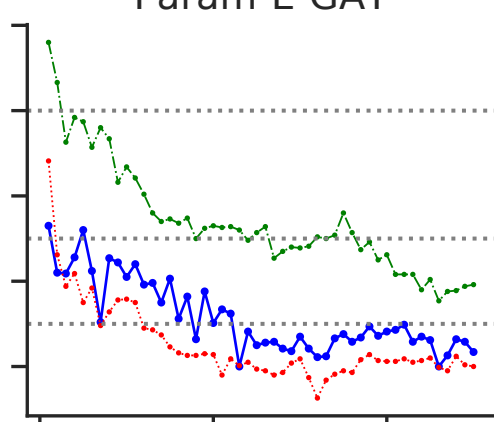

GCN-E-GAT

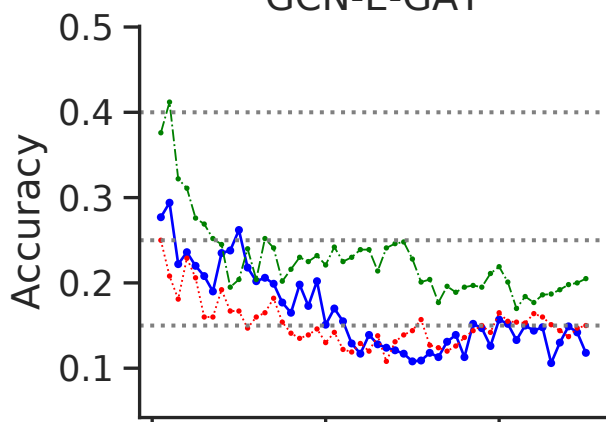

GAT-RGCN

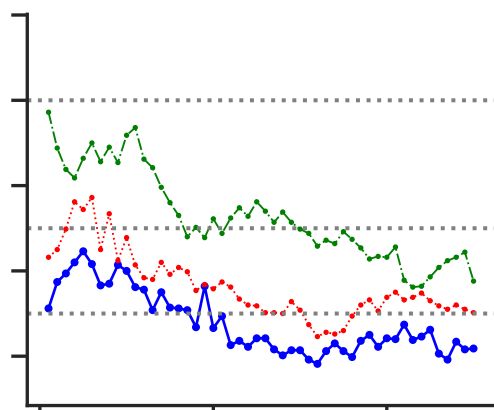

Param-RGCN

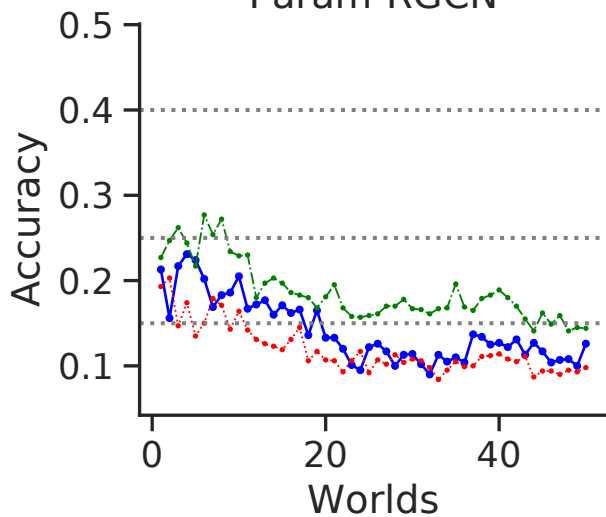

GCN-RGCN

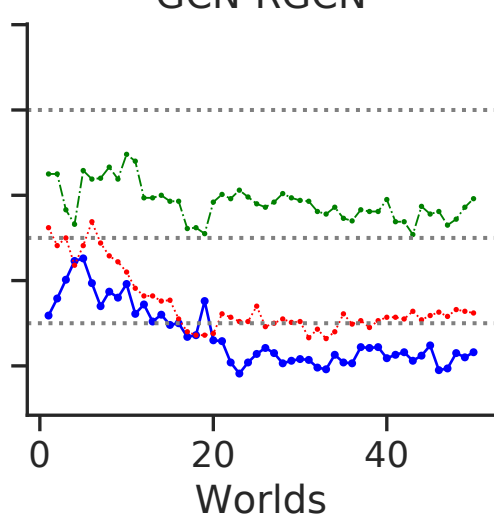

- Shared Composition and Representation
- Shared Representation Unique Composition
- Shared Composition Unique Representation
