# Supplementary material
Source: ML conference proceedings conference paper supplement (https://openreview.net/forum?id=Ux5zdAir9-U)

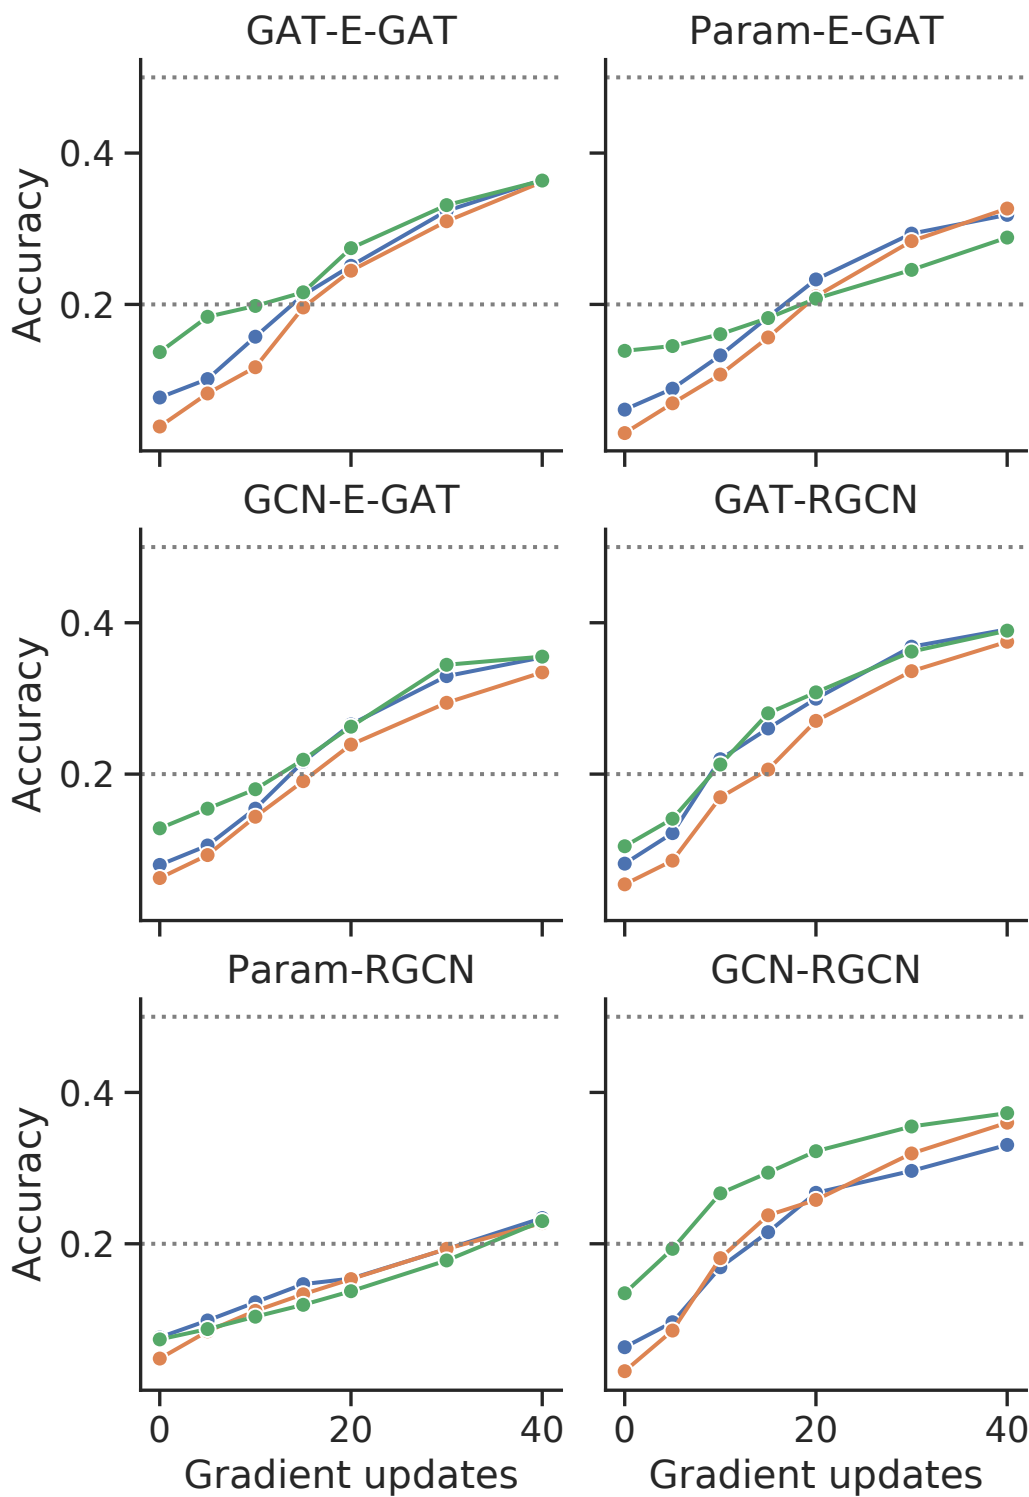

train\_world    — easy    — medium    — hard

Supplement: supplementary_material [file attachment]

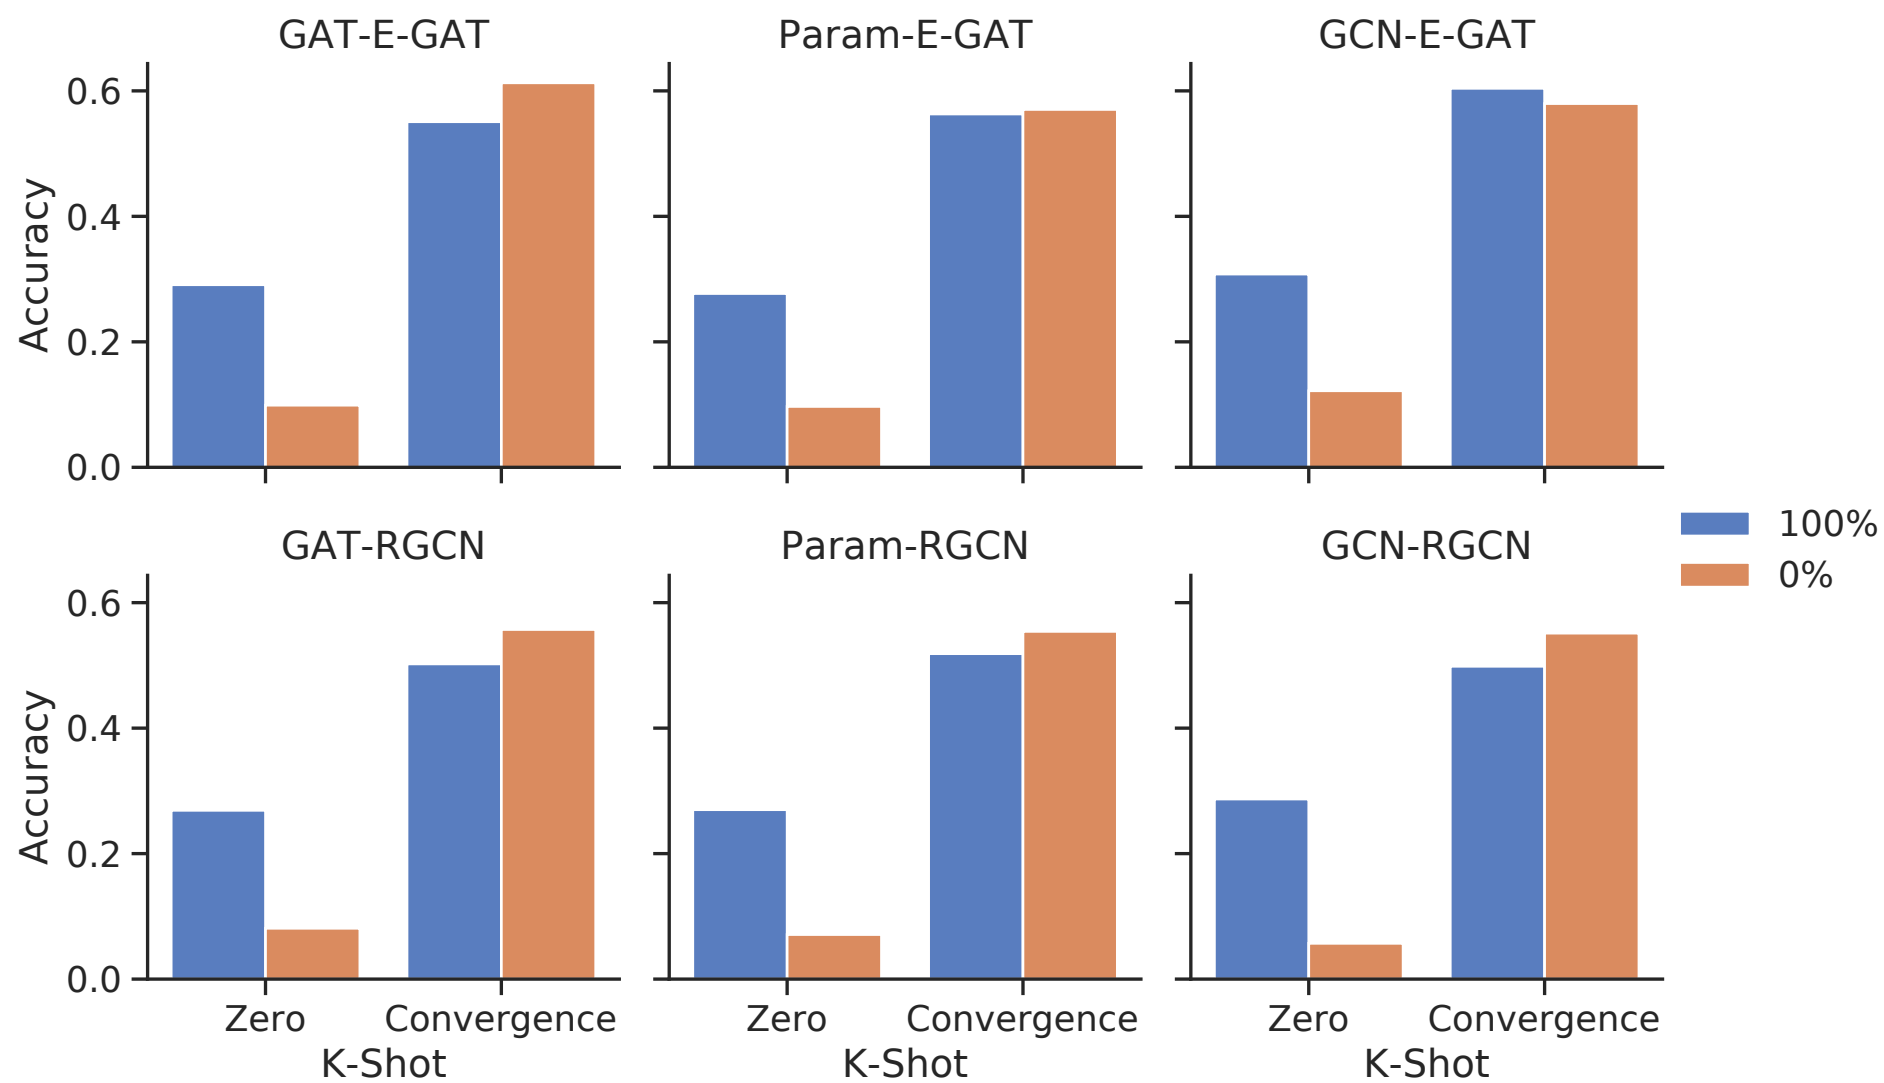

Supplement: supplementary_material [file attachment]

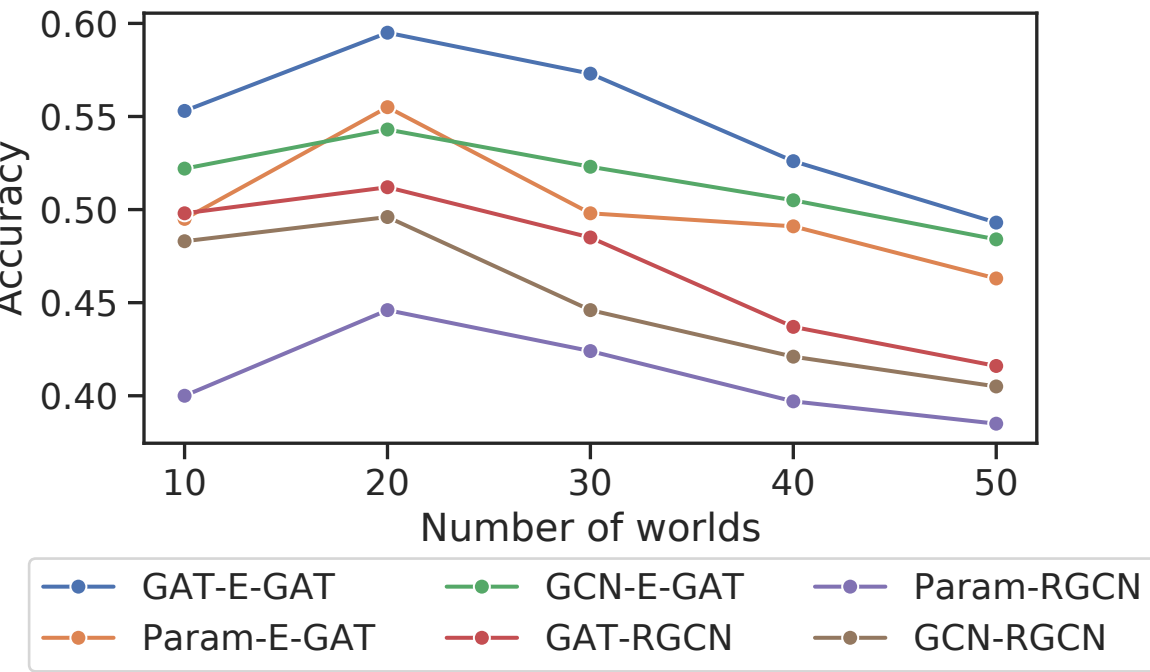

Supplement: supplementary_material [file attachment]

group = 0.0

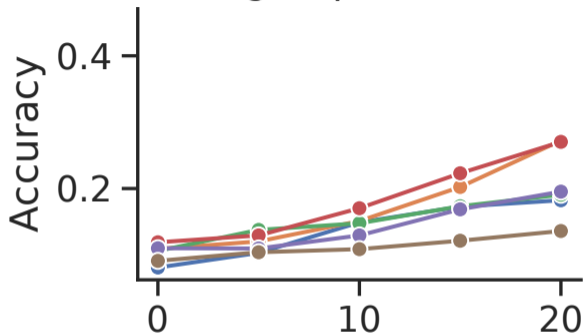

group = 1.0

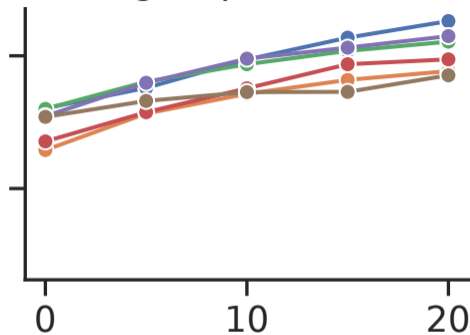

Gradient updates

Gradient updates

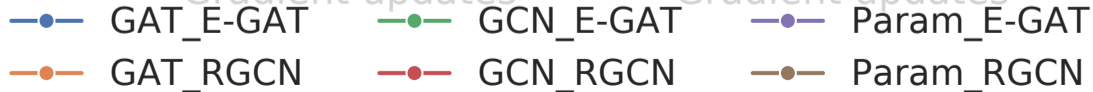

Supplement: supplementary_material [file attachment]

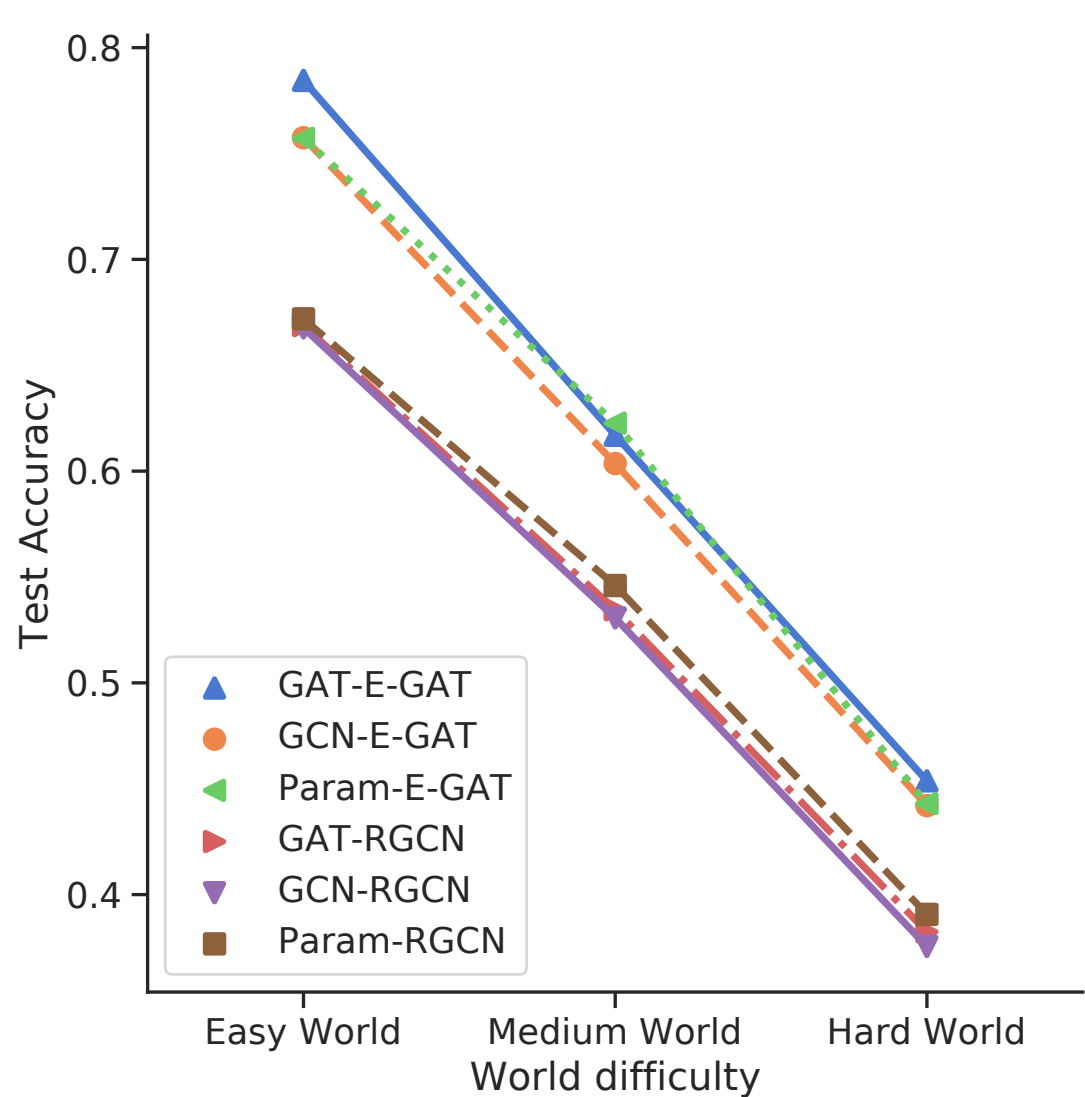

Supplement: supplementary_material [file attachment]
